# Supplementary material
Source: PubMed Central journal article supplement (PMC4967025)
Supplement: NIHMS786076-supplement.pdf [file NIHMS786076-supplement.pdf]

## **Supplementary Material**

### **Single molecule measurements of DNA helicase activity with magnetic tweezers and T-test-based step-finding analysis**

Yeonee Seol<sup>1,§</sup>, Marie-Paule Strub<sup>1,&</sup>, and Keir C. Neuman<sup>1,\*</sup>

<sup>1</sup> Laboratory of Single Molecule Biophysics, NHLBI, National Institutes of Health, Bethesda, MD, 20892, USA

Address: 50 South Dr. #3517, Bethesda, MD 20892, U.S.A

Email address: § [seoly@mail.nih.gov](mailto:seoly@mail.nih.gov); & [strub@mail.nih.gov](mailto:strub@mail.nih.gov); \* [neumankc@mail.nih.gov](mailto:neumankc@mail.nih.gov)

**Corresponding author:** Keir C. Neuman

Figure S1

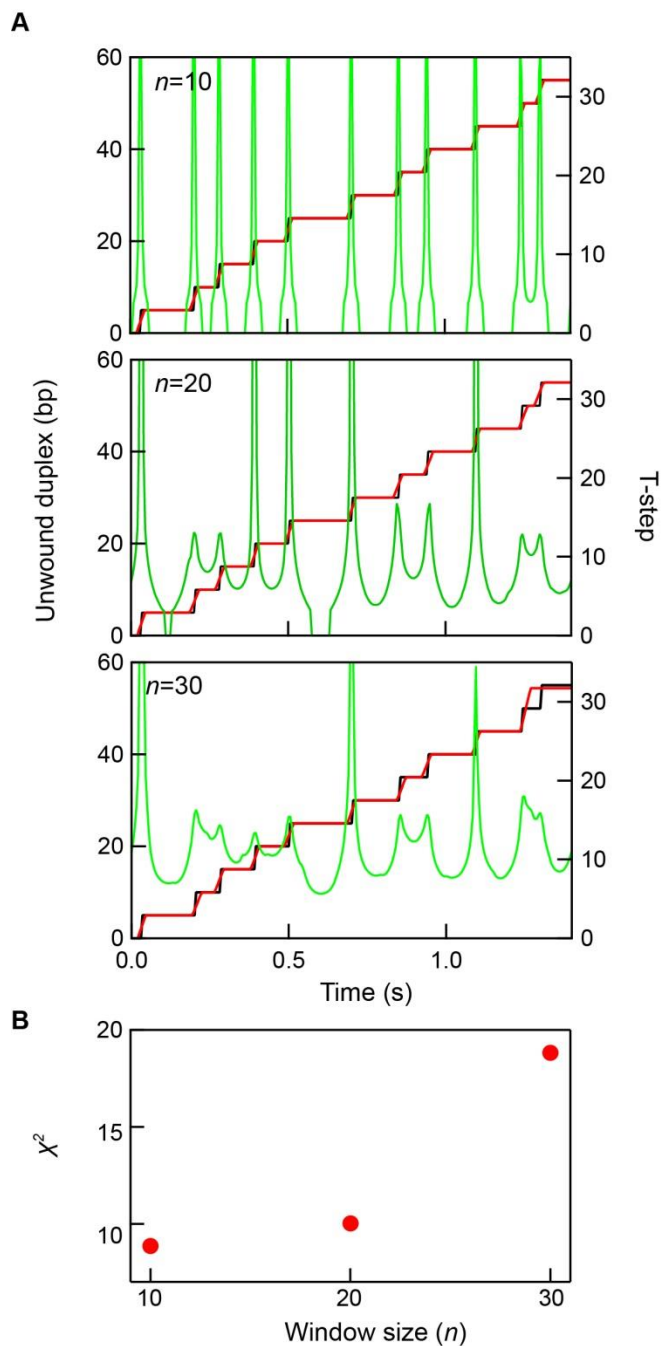

Supplementary Figure 1. The effects of window size,  $n$ , on T-test based step finding with simulated stepping traces. **A.** T-test step finding was performed on a simulated stepping trace (black solid line) with three different window sizes ( $n = 10, 20$ , and  $30$  points) and  $\alpha = 0.005$  (99% confidence for two tail T-test). The step trace corresponds to a stochastic simulation trace (200 points per second) as described in the main text, without added noise. In the absence of noise, the step fitting performs better with a smaller window size and displays less distortion of the fitted steps. **B.** Comparison between the step trace and the fits from T-test step finding. The errors in the fit, represented by  $\chi^2$ , increase with increasing  $n$ .

Figure S2

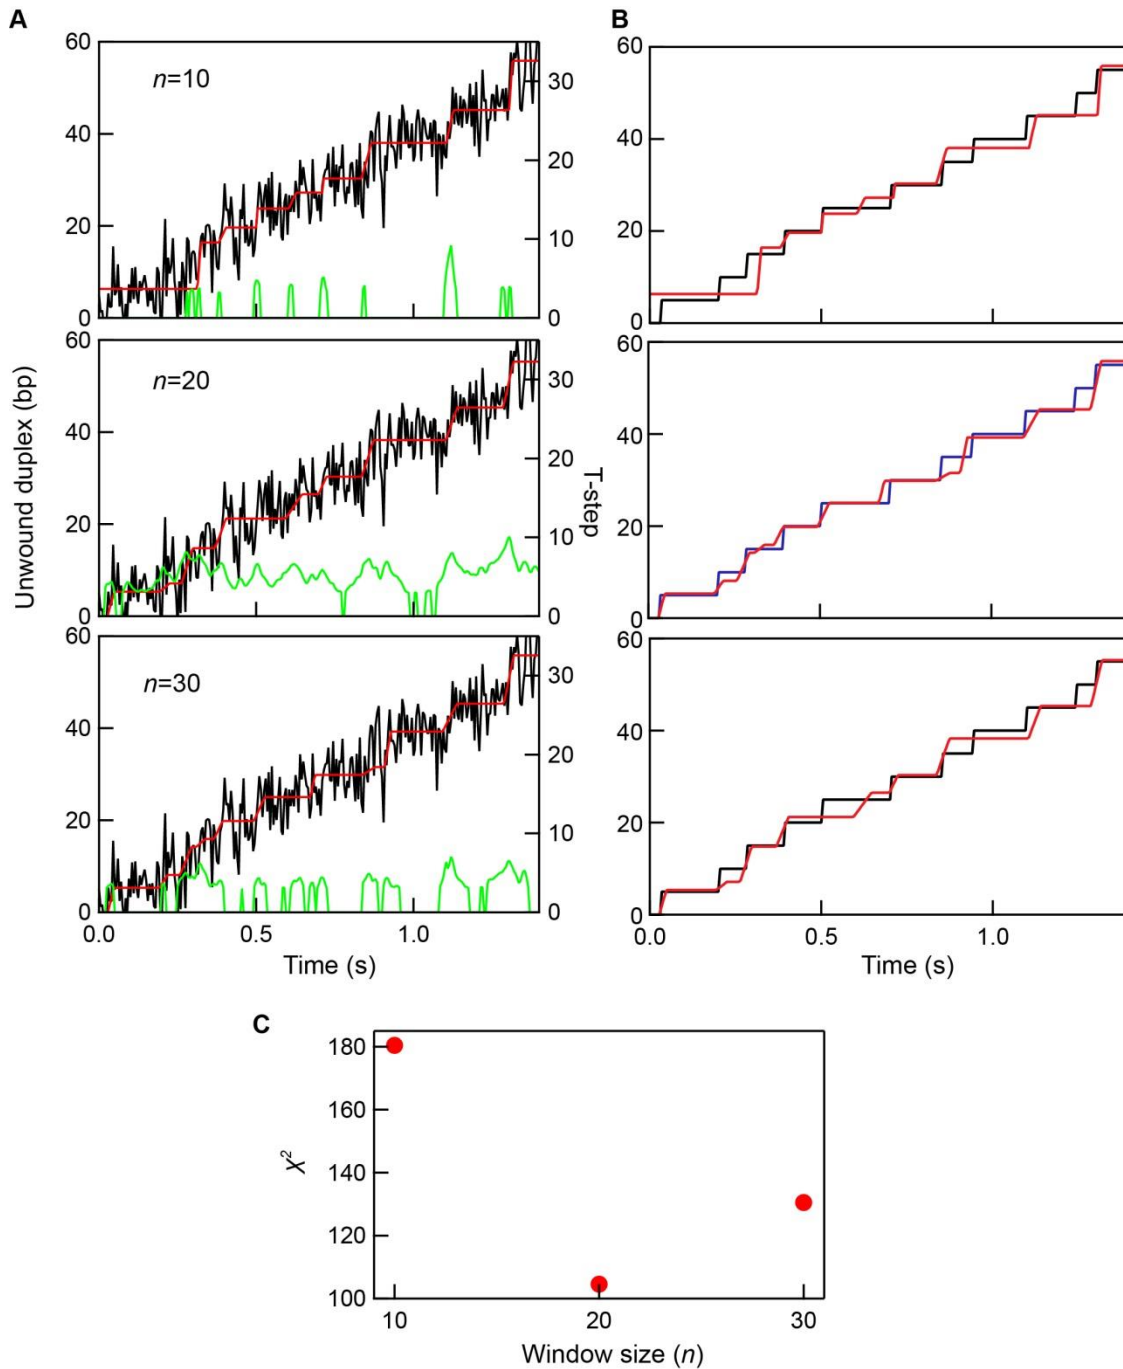

Supplementary Figure 2. The effects of window size,  $n$  on T-test based step finding with simulated noisy stepping traces. **A.** T-test step finding was performed on simulated stepping traces (200 points per second) with Gaussian noise ( $\sigma = 5$  bp) (black solid line) with three different window sizes ( $n = 10, 20,$  and  $30$  points) and  $\alpha = 0.005$  (99% confidence for two tail T-test). Due to the noise in the stepping trace, more T-step values for fitting with  $n = 10$  are within the acceptance level of the null hypothesis test, i.e., no significant difference between two means from two windows, resulting in missed steps. **B.** Comparison between the step trace and the fits from T-test-based step finding. **C.** The error in the fit,

represented by the  $\chi^2$  value, is minimum at  $n = 20$  indicating the optimal window size for this particular set of step-size (5 bp), step-rate ( $10 \text{ s}^{-1}$ ), and noise (5 bp).
